# Supplementary material
Source: HighWire-hosted journal article supplement (https://jnm.snmjournals.org/highwire/filestream/95119/field_highwire_adjunct_files/0/185140_Supplemental_Data.pdf)
Supplement: 185140_Supplemental_Data.pdf [file 185140_Supplemental_Data.pdf]

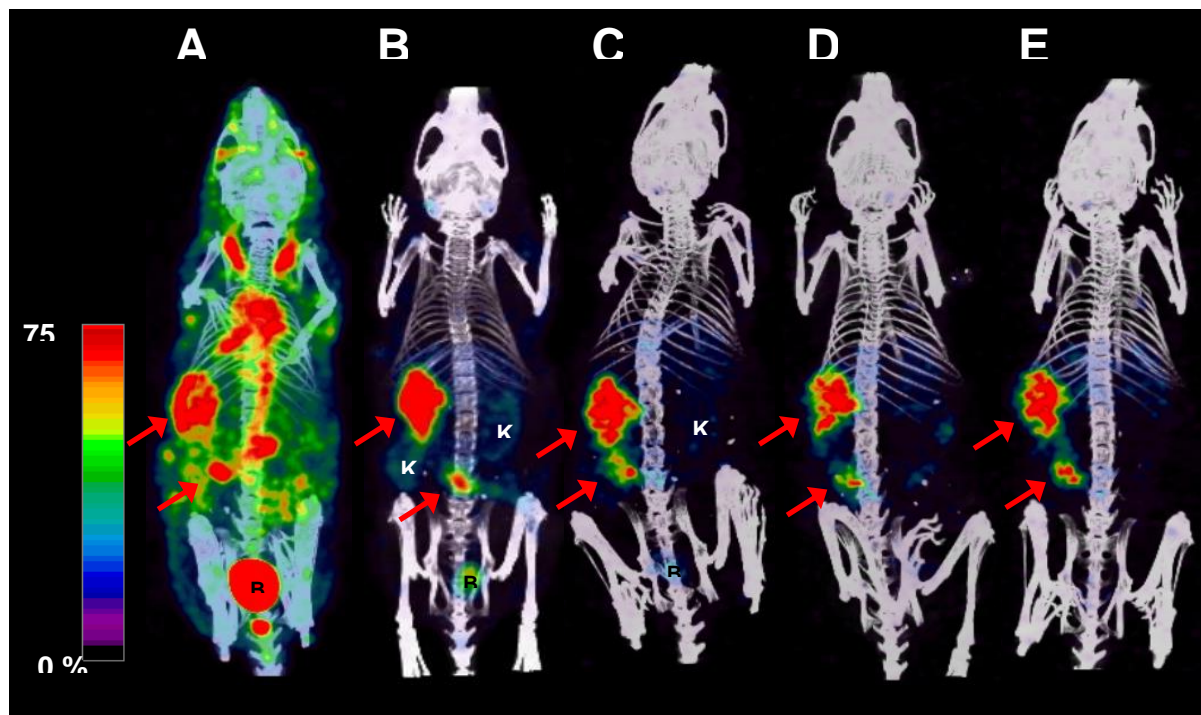

**SUPPLEMENTAL FIGURE 1.** Co-registered whole-body SPECT/CT scans of a single female nude mouse grafted with HT29 tumor cells acquired 3 (A), 20 (B), 45 (C), 69 (D), and 93 (E) hours p.i. of 159.7 MBq of  $^{177}\text{Lu}$ -3BP-227. Arrows show HT29 tumors that have grown irregularly as two closely located tumors and overlap the ipsilateral kidney. SPECT data were scaled to 0-75% of maximum count value in the tumor of the respective dataset. B = Urinary bladder, K = Kidney. Tumor-to-kidney activity ratios: 1.11 at 3 h p.i., 2.81 at 20 h p.i., 4.42 at 45 h p.i., 5.75 at 69 h p.i. and 7.84 at 93 h p.i. Tumor-to-liver activity ratios: 1.51 at 3 h p.i., 4.02 at 20 h p.i., 3.65 at 45 h p.i., 3.70 at 69 h p.i. and 3.62 at 93 h p.i..

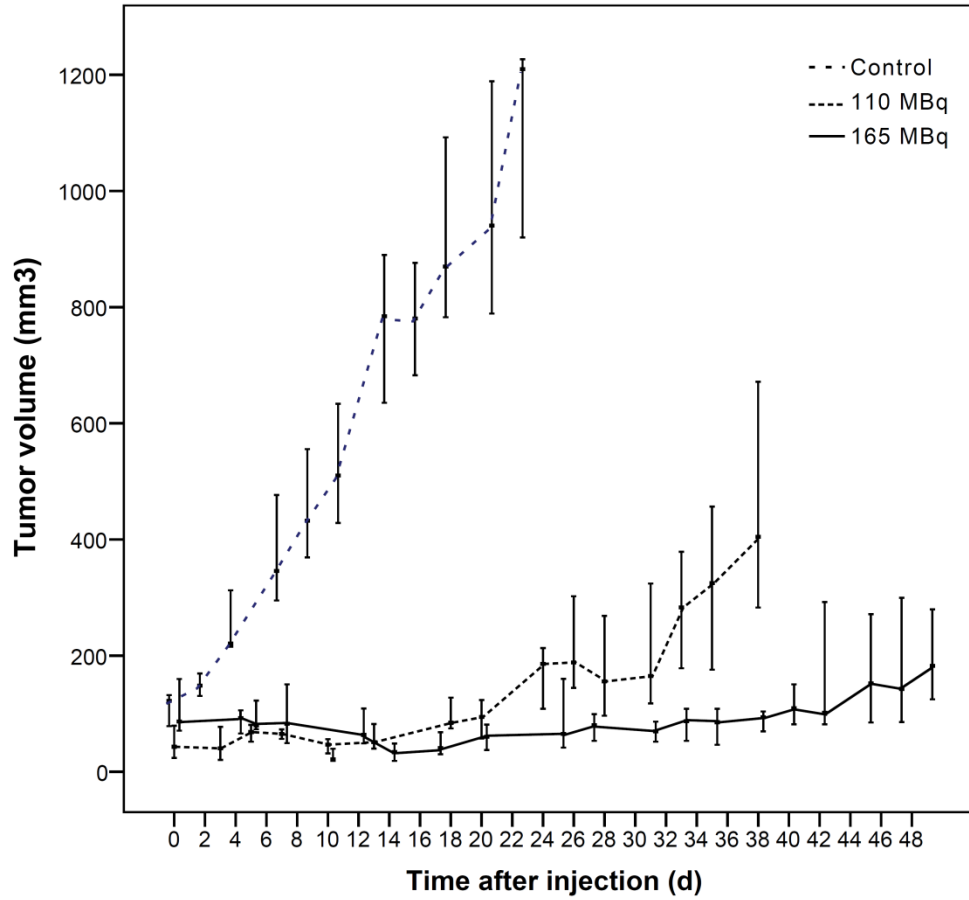

**SUPPLEMENTAL FIGURE 2.** Absolute tumor volumes after injection of 165 MBq (n = 9) or 110 MBq (n = 10) of  $^{177}\text{Lu}$ -3BP-227 or 0,9% NaCl as control (n = 10) in nude mice grafted with HT29 cells. Data are presented as median and interquartile range.

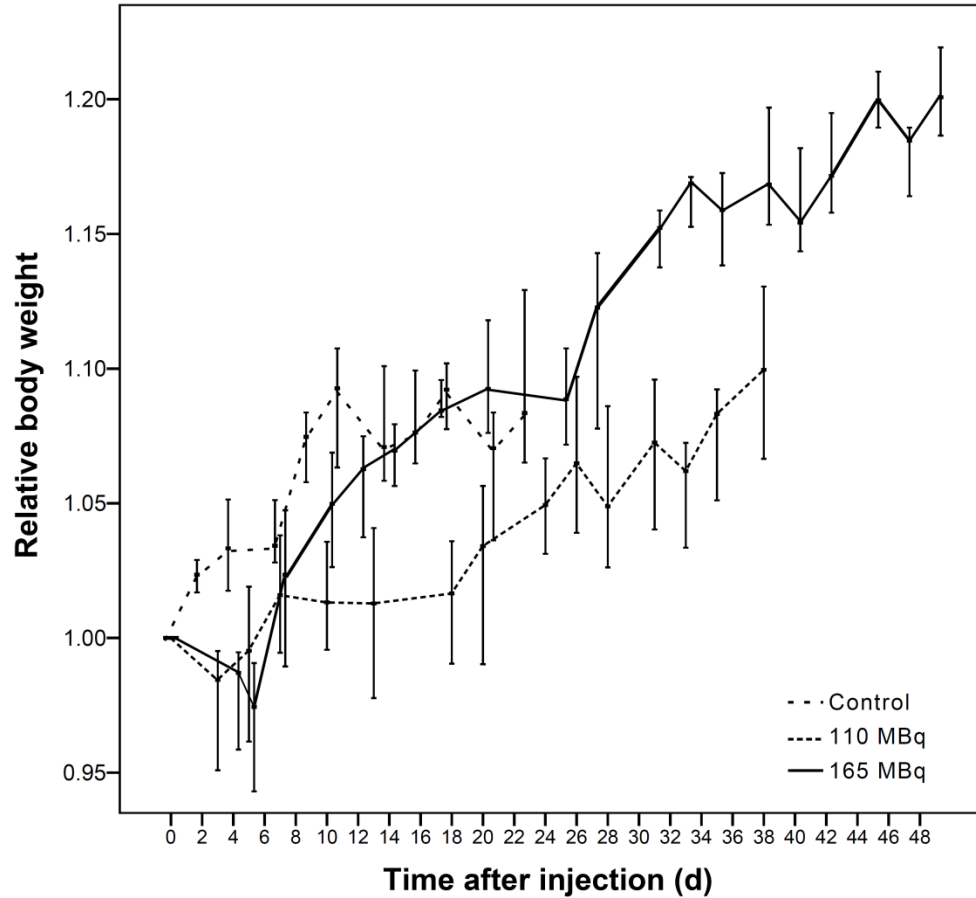

**SUPPLEMENTAL FIGURE 3.** Body weight development of nude mice grafted with HT29 cells after injection of 165 MBq (n = 9) or 110 MBq (n = 10) of  $^{177}\text{Lu}$ -3BP-227 or 0,9% NaCl as control (n = 10). Body weight data are normalized to the measurement at the day of injection and represented as median and interquartile range.

**SUPPLEMENTAL TABLE 1.** Tissue uptake and tumor-to-normal tissue ratios of <sup>177</sup>Lu-3BP-227 in female nude mice grafted with NTR1-positive HT29 cells.

|                | <b>3 h p.i. n = 5</b>     | <b>20 h p.i. n = 5</b>   | <b>69 h p.i. n = 5</b> |
|----------------|---------------------------|--------------------------|------------------------|
| Tumor          | 18.96 ± 3.55 <sup>†</sup> | 8.64 ± 4.00 <sup>‡</sup> | 2.68 ± 1.55            |
| Heart          | 2.23 ± 0.29               | 0.16 ± 0.03              | 0.04 ± 0.02            |
| Lungs          | 3.63 ± 0.89               | 0.30 ± 0.11              | 0.04 ± 0.01            |
| Kidney         | 4.67 ± 1.64               | 1.71 ± 0.49              | 0.27 ± 0.11            |
| Liver          | 3.10 ± 0.42               | 0.50 ± 0.21              | 0.34 ± 0.03            |
| Spleen         | 1.96 ± 0.60               | 0.38 ± 0.06              | 0.07 ± 0.05            |
| Stomach*       | 1.06 ± 0.80               | 0.18 ± 0.07              | 0.03 ± 0.01            |
| Intestine*     | 2.26 ± 0.09               | 0.29 ± 0.02              | 0.11 ± 0.02            |
| Adipose tissue | 0.97 ± 0.48               | 0.15 ± 0.09              | 0.05 ± 0.03            |
| Muscle         | 1.04 ± 0.13               | 0.18 ± 0.03              | 0.02 ± 0.02            |
| Bone           | 1.03 ± 0.67               | 0.50 ± 0.13              | 0.26 ± 0.13            |
| Brain          | 0.21 ± 0.12               | 0.03 ± 0.02              | 0.03 ± 0.03            |
| Blood          | 6.82 ± 0.63               | 0.19 ± 0.03              | 0.03 ± 0.01            |
| Urine          | 63.20 ± 29.06             | 3.58 ± 0.51              | 0.46 ± 0.07            |
| Tumor/blood    | 2.78 ± 0.48               | 44.23 ± 13.45            | 85.04 ± 49.56          |
| Tumor/liver    | 6.23 ± 1.44               | 32.65 ± 45.90            | 7.76 ± 4.56            |
| Tumor/muscle   | 18.42 ± 4.07              | 49.63 ± 22.54            | 172.69 ± 206.60        |
| Tumor/kidney   | 5.15 ± 2.47               | 6.33 ± 4.31              | 15.86 ± 19.28          |

**Uptake is expressed as mean percentage of injected dose per gram of tissue (%ID/g) ± SD.** \*Organs with their content. <sup>†</sup>*P* = 0.0005 vs. <sup>111</sup>In-3B-227 3 h p.i. <sup>‡</sup>*P* = 0.022 vs. <sup>111</sup>In-3B-227 24 h p.i. (<sup>111</sup>In-3BP-227 data: Schulz J, Rohracker M et al. Comparative Evaluation of the Biodistribution Profiles of a Series of Nonpeptidic Neurotensin Receptor-1 Antagonists Reveals a Promising Candidate for Theranostic Applications. *J. Nucl. Med.* 2016;57:1120-1123.)

**SUPPLEMENTAL TABLE 2.** Organ and effective doses (mSv/MBq) after application of <sup>177</sup>Lu-3BP-227.

| <b>Target Organ</b> | <b>Dose (mSv/MBq)</b> |
|---------------------|-----------------------|
| Brain               | 0.0002                |
| Intestine           | 0.0106                |
| Stomach Wall        | 0.0085                |
| Heart Wall          | 0.0525                |
| Kidneys             | 0.1250                |
| Liver               | 0.0087                |
| Lungs               | 0.0599                |
| Muscle              | 0.0006                |
| Red Marrow          | 0.0014                |
| Osteogenic cells    | 0.0047                |
| Spleen              | 0.0875                |
| Effective Dose      | 0.0114                |
